# Supplementary material
Source: Springer Nature journal article supplement (https://www.springermedizin.de/resource/supplementary/12877_2007_81_MOESM2_ESM.pdf/9441128)
Supplement: MOESM2 [file 9441128]

Telephone screen  
N = 191

Not eligible  
N = 41

Eligible  
N = 150

Screening Test  
N = 126

Did not meet hip OA clinical  
criteria  
N = 20

**Screened for fall risk  
N = 106**
